# Supplementary material for: Neoadjuvant PROSTVAC prior to radical prostatectomy enhances T-cell infiltration into the tumor immune microenvironment in men with prostate cancer
Source: PubMed Central journal article supplement — J Immunother Cancer. 2020 Apr 7;8(1):e000655. doi: 10.1136/jitc-2020-000655 (PMC7174144; doi:10.1136/jitc-2020-000655), 2020-04-07
Supplement: jitc-2020-000655supp002.pdf [file jitc-2020-000655supp002.pdf]

Supplemental Table 1

| Toxicity                     | Grade 2                   | Grade 3 |
|------------------------------|---------------------------|---------|
|                              | # of patients/# of events |         |
| <b>Attributed to Vaccine</b> |                           |         |
| Injection Site Reaction      | 18/28                     | 0       |
| Fatigue                      | 2/2                       | 0       |
| Flu-like Symptoms            | 2/2                       | 0       |
| Fever                        | 1/1                       | 0       |
| Nasal Congestion             | 1/1                       | 0       |
| Pruritis                     | 1/1                       | 0       |
| <b>Attributed to Surgery</b> |                           |         |
| Thromboembolic Event         | 0                         | 2/2     |
| Hypertension                 | 0                         | 1/2     |
| Infected Lymphocele          | 0                         | 1/1     |
| Paresthesia                  | 0                         | 1/1     |
| Abdominal Pain               | 1/1                       | 0       |
| Creatinine Increased         | 1/1                       | 0       |
| Pain in Extremity            | 1/1                       | 0       |
| Urinary Incontinence         | 1/1                       | 0       |
