# Supplementary material for: Neoadjuvant PROSTVAC prior to radical prostatectomy enhances T-cell infiltration into the tumor immune microenvironment in men with prostate cancer
Source: PubMed Central journal article supplement — J Immunother Cancer. 2020 Apr 7;8(1):e000655. doi: 10.1136/jitc-2020-000655 (PMC7174144; doi:10.1136/jitc-2020-000655), 2020-04-07
Supplement: jitc-2020-000655supp010.pdf [file jitc-2020-000655supp010.pdf]

Supplemental Table 4

| Patient # | Timepoint<br>(vs Pre) | Immune Response to PSA |             |            |            |               |             |            |            | Immune Response to Brachyury |             |            |            |               |             |            |            | Immune Response to MUC1 |             |            |            |               |             |            |            |
|-----------|-----------------------|------------------------|-------------|------------|------------|---------------|-------------|------------|------------|------------------------------|-------------|------------|------------|---------------|-------------|------------|------------|-------------------------|-------------|------------|------------|---------------|-------------|------------|------------|
|           |                       | CD4<br>CD107a          | CD4<br>IFNg | CD4<br>IL2 | CD4<br>TNF | CD8<br>CD107a | CD8<br>IFNg | CD8<br>IL2 | CD8<br>TNF | CD4<br>CD107a                | CD4<br>IFNg | CD4<br>IL2 | CD4<br>TNF | CD8<br>CD107a | CD8<br>IFNg | CD8<br>IL2 | CD8<br>TNF | CD4<br>CD107a           | CD4<br>IFNg | CD4<br>IL2 | CD4<br>TNF | CD8<br>CD107a | CD8<br>IFNg | CD8<br>IL2 | CD8<br>TNF |
| 1         | D82                   | 0                      | 0           | 0          | 0          | 0             | 0           | 0          | 0          | 0                            | 64          | 38         | 17         | 0             | 31          | 0          | 35         | 67                      | 5           | 293        | 254        | 0             | 0           | 0          | 0          |
| 2         | D103                  | 0                      | 15          | 76         | 166        | 102           | 53          | 31         | 278        | 0                            | 17          | 69         | 192        | 97            | 0           | 0          | 96         | 150                     | 33          | 0          | 100        | 226           | 0           | 0          | 125        |
| 3         | D113                  | 0                      | 0           | 0          | 0          | 0             | 0           | 0          | 0          | 0                            | 0           | 0          | 0          | 60            | 0           | 0          | 79         | 0                       | 0           | 0          | 0          | 5             | 0           | 0          | 0          |
| 5         | D63                   | 275                    | 0           | 0          | 0          | 0             | 0           | 0          | 0          | 217                          | 0           | 0          | 0          | 0             | 0           | 0          | 0          | 0                       | 0           | 0          | 0          | 0             | 0           | 0          | 0          |
| 7         | D63                   | 0                      | 0           | 0          | 0          | 0             | 11          | 0          | 0          | 0                            | 0           | 0          | 0          | 0             | 17          | 0          | 0          | 5                       | 0           | 0          | 0          | 44            | 0           | 0          | 0          |
| 8         | D64                   | 0                      | 0           | 0          | 0          | 0             | 0           | 45         | 0          | 0                            | 4           | 0          | 0          | 0             | 38          | 54         | 0          | 0                       | 0           | 0          | 0          | 0             | 0           | 0          | 0          |
| 9         | D64                   | 0                      | 0           | 0          | 0          | 0             | 0           | 0          | 0          | 0                            | 0           | 0          | 0          | 0             | 0           | 0          | 0          | 0                       | 22          | 0          | 5          | 0             | 0           | 0          | 0          |
| 10        | D62                   | 2                      | 86          | 85         | 102        | 0             | 0           | 0          | 0          | 0                            | 0           | 0          | 0          | 0             | 0           | 0          | 0          | 225                     | 0           | 0          | 0          | 0             | 0           | 8          | 0          |
| 11        | D62                   | 0                      | 445         | 310        | 163        | 0             | 153         | 32         | 228        | 0                            | 104         | 172        | 192        | 79            | 0           | 0          | 0          | 0                       | 0           | 64         | 0          | 0             | 0           | 9          | 0          |
| 12        | D64                   | 0                      | 0           | 0          | 0          | 0             | 0           | 0          | 0          | 0                            | 15          | 0          | 0          | 0             | 0           | 0          | 0          | 0                       | 0           | 0          | 0          | 0             | 0           | 27         | 0          |
| 13        | D62                   | 0                      | 20          | 53         | 0          | 17            | 66          | 21         | 170        | 58                           | 40          | 13         | 97         | 66            | 28          | 24         | 8          | 15                      | 0           | 50         | 0          | 0             | 0           | 52         | 0          |
| 14        | D92                   | 651                    | 0           | 0          | 0          | 0             | 0           | 0          | 0          | 252                          | 0           | 14         | 0          | 0             | 0           | 0          | 0          | 1042                    | 0           | 0          | 0          | 0             | 0           | 0          | 0          |
| 15        | D60                   | 0                      | 0           | 0          | 0          | 0             | 0           | 0          | 0          | 629                          | 228         | 113        | 154        | 239           | 19          | 0          | 108        | 653                     | 75          | 31         | 67         | 35            | 3           | 0          | 0          |
| 16        | D64                   | 0                      | 0           | 0          | 3          | 0             | 0           | 0          | 0          | 0                            | 0           | 0          | 0          | 7             | 0           | 22         | 0          | 0                       | 0           | 18         | 63         | 0             | 0           | 13         | 0          |
| 17        | D65                   | 570                    | 64          | 0          | 132        | 0             | 12          | 20         | 0          | 0                            | 0           | 0          | 0          | 0             | 11          | 1          | 0          | 418                     | 0           | 0          | 0          | 0             | 0           | 4          | 0          |
| 18        | D63                   | 0                      | 0           | 0          | 31         | 0             | 15          | 0          | 0          | 1646                         | 231         | 50         | 206        | 243           | 75          | 0          | 20         | 0                       | 94          | 10         | 32         | 0             | 9           | 0          | 0          |
| 19        | D63                   | 0                      | 0           | 0          | 23         | 0             | 0           | 0          | 46         | 0                            | 0           | 0          | 26         | 0             | 0           | 0          | 0          | 323                     | 70          | 54         | 105        | 0             | 32          | 0          | 0          |
| 20        | D64                   | 120                    | 0           | 32         | 0          | 0             | 0           | 0          | 0          | 0                            | 0           | 0          | 4          | 0             | 25          | 0          | 136        | 0                       | 0           | 0          | 0          | 0             | 32          | 0          | 5          |
| 21        | D65                   | 102                    | 62          | 10         | 18         | 0             | 53          | 0          | 0          | 31                           | 51          | 0          | 32         | 0             | 108         | 0          | 745        | 0                       | 23          | 2          | 0          | 0             | 0           | 0          | 0          |
| 22        | D65                   | 0                      | 288         | 0          | 0          | 42            | 0           | 0          | 0          | 1353                         | 123         | 304        | 697        | 111           | 0           | 0          | 41         | 2347                    | 2315        | 979        | 2014       | 498           | 0           | 0          | 164        |
| 23        | D84                   | 0                      | 0           | 0          | 0          | 0             | 0           | 2          | 0          | 313                          | 0           | 0          | 130        | 177           | 0           | 0          | 0          | 0                       | 0           | 0          | 0          | 0             | 0           | 0          | 0          |
| 24        | D63                   | 0                      | 0           | 0          | 0          | 0             | 0           | 0          | 0          | 0                            | 0           | 0          | 0          | 0             | 0           | 0          | 0          | 0                       | 0           | 0          | 0          | 0             | 15          | 0          | 0          |
| 25        | D64                   | 0                      | 42          | 0          | 0          | 0             | 0           | 6          | 0          | 0                            | 90          | 0          | 0          | 0             | 0           | 87         | 0          | 0                       | 75          | 0          | 0          | 55            | 0           | 28         | 0          |
| 26        | D69                   | 0                      | 0           | 0          | 0          | 0             | 0           | 6          | 0          | 0                            | 0           | 0          | 0          | 0             | 0           | 0          | 0          | 0                       | 0           | 0          | 0          | 0             | 0           | 6          | 0          |
| 27        | D64                   | 809                    | 72          | 50         | 70         | 71            | 0           | 2          | 0          | 748                          | 92          | 96         | 90         | 76            | 0           | 18         | 17         | 2359                    | 124         | 95         | 196        | 296           | 13          | 16         | 23         |
