# Supplementary material for: Neoadjuvant PROSTVAC prior to radical prostatectomy enhances T-cell infiltration into the tumor immune microenvironment in men with prostate cancer
Source: PubMed Central journal article supplement — J Immunother Cancer. 2020 Apr 7;8(1):e000655. doi: 10.1136/jitc-2020-000655 (PMC7174144; doi:10.1136/jitc-2020-000655), 2020-04-07
Supplement: jitc-2020-000655supp012.pdf [file jitc-2020-000655supp012.pdf]

Supplemental Table 5

| <b>Patient #</b> | <b>Predicted 5 yr Progression-free Probability (Pre-RP)</b> | <b>Staging at RP</b> | <b>Predicted 5 yr Recurrence-free Probability (Post-RP)</b> | <b>Follow-up Time (yrs)</b> | <b>Biochemical Recurrence?</b> | <b>Antigen-Specific Responses</b> |
|------------------|-------------------------------------------------------------|----------------------|-------------------------------------------------------------|-----------------------------|--------------------------------|-----------------------------------|
| 26               | 94                                                          | PT2C                 | 94                                                          | 1.02                        | no                             | 0                                 |
| 27               | 94                                                          | PT2C                 | 97                                                          | 1.02                        | no                             | 3                                 |
| 11               | 88                                                          | PT2C                 | 80                                                          | 1.01                        | no                             | 1                                 |
| 8                | 87                                                          | T2C                  | 93                                                          | 1.29                        | no                             | 0                                 |
| 10               | 87                                                          | PT2C                 | 92                                                          | 2.84                        | no                             | 0                                 |
| 16               | 86                                                          | PT3A                 | 87                                                          | 2.01                        | no                             | 0                                 |
| 23               | 85                                                          | PT2C                 | 94                                                          | 2.24                        | no                             | 1                                 |
| 25               | 84                                                          | PT2                  | 92                                                          | 1.05                        | no                             | 0                                 |
| 19               | 83                                                          | PT2C                 | 91                                                          | 2.44                        | no                             | 1                                 |
| 1                | 82                                                          | T2C                  | 92                                                          | 1.65                        | no                             | 1                                 |
| 5                | 81                                                          | PT2A                 | 80                                                          | 2.54                        | no                             | 1                                 |
| 4                | 80                                                          | PT2C                 | 64                                                          | 2.19                        | no                             | Not tested                        |
| 18               | 79                                                          | PT2C                 | 95                                                          | 2.17                        | no                             | 1                                 |
| 22               | 69                                                          | PT2C                 | 93                                                          | 1.07                        | no                             | 3                                 |
| 15               | 65                                                          | PT3A                 | 40                                                          | 1.30                        | no                             | 2                                 |
| 2                | 61                                                          | T2C                  | 77                                                          | 2.13                        | no                             | 1                                 |
| 9                | 56                                                          | PT2C                 | 71                                                          | 0.61                        | yes                            | 0                                 |
| 3                | 53                                                          | PT3B                 | 53                                                          | 2.15                        | yes                            | 0                                 |
| 13               | 53                                                          | PT2C                 | 60                                                          | 2.51                        | no                             | 0                                 |
| 24               | 52                                                          | PT2A                 | 96                                                          | 2.52                        | no                             | 0                                 |
| 17               | 50                                                          | PT2C                 | 59                                                          | 2.04                        | no                             | 2                                 |
| 12               | 42                                                          | PT2C                 | 74                                                          | 2.94                        | no                             | 0                                 |
| 21               | 41                                                          | PT2C                 | 54                                                          | 2.85                        | no                             | 1                                 |
| 6                | 40                                                          | PT2C                 | 58                                                          | 1.68                        | no                             | Not tested                        |
| 20               | 23                                                          | PT3B                 | 10                                                          | 0.17                        | yes                            | 0                                 |
| 7                | 10                                                          | PT2C                 | 42                                                          | 2.01                        | yes                            | 0                                 |
