# Supplementary material for: Neoadjuvant PROSTVAC prior to radical prostatectomy enhances T-cell infiltration into the tumor immune microenvironment in men with prostate cancer
Source: PubMed Central journal article supplement — J Immunother Cancer. 2020 Apr 7;8(1):e000655. doi: 10.1136/jitc-2020-000655 (PMC7174144; doi:10.1136/jitc-2020-000655), 2020-04-07
Supplement: jitc-2020-000655supp013.pdf [file jitc-2020-000655supp013.pdf]

## Supplemental Methods: Staining Protocol

|                          | Catalog # | Antibody      | Host   | React | Lot         | Dilution | HEIR | Secondary antibody             | Opal | Opal dilution |
|--------------------------|-----------|---------------|--------|-------|-------------|----------|------|--------------------------------|------|---------------|
| <b>Abcam [EPR6855]</b>   | ab133616  | Anti-CD4      | Rabbit | H     | GR253270-4  | 1:1000   | AR6  | MACH4 rabbit x 10 min          | 520  | 1:150         |
| <b>Abcam [CD8/468]</b>   | ab187279  | Anti-CD8      | Mouse  | H     | GR3035505-9 | 1:200    | AR9  | ImmPRESS mouse vector x 10 min | 570  | 1:150         |
| <b>Invitrogen</b>        | MA5-16365 | FOXP3         | Rabbit | H     | SF2406061   | 1:200    | AR9  | MACH4 rabbit x 10 min          | 540  | 1:150         |
| <b>Spring Bioscience</b> | M4420     | PDL-1 (SP142) | Rabbit | H     | 22717       | 1:200    | AR6  | MACH4 rabbit x 10 min          | 620  | 1:150         |
| <b>Ventana</b>           | 790-4286  | KI-67         | Rabbit | H     | Y07159      | RTU x2   | AR6  | MACH4 rabbit x 10 min          | 650  | 1:150         |
| <b>Santa Cruz</b>        | sc-81714  | PAN-CYTOK     | Mouse  | H     | I1115       | 1:400    | AR9  | ImmPRESS mouse vector x 10 min | 690  | 1:150         |
