# Supplementary figures and images for: Neoadjuvant PROSTVAC prior to radical prostatectomy enhances T-cell infiltration into the tumor immune microenvironment in men with prostate cancer
Source: PubMed Central journal article supplement — J Immunother Cancer. 2020 Apr 7;8(1):e000655. doi: 10.1136/jitc-2020-000655 (PMC7174144; doi:10.1136/jitc-2020-000655), 2020-04-07

Supplemental Fig. 2

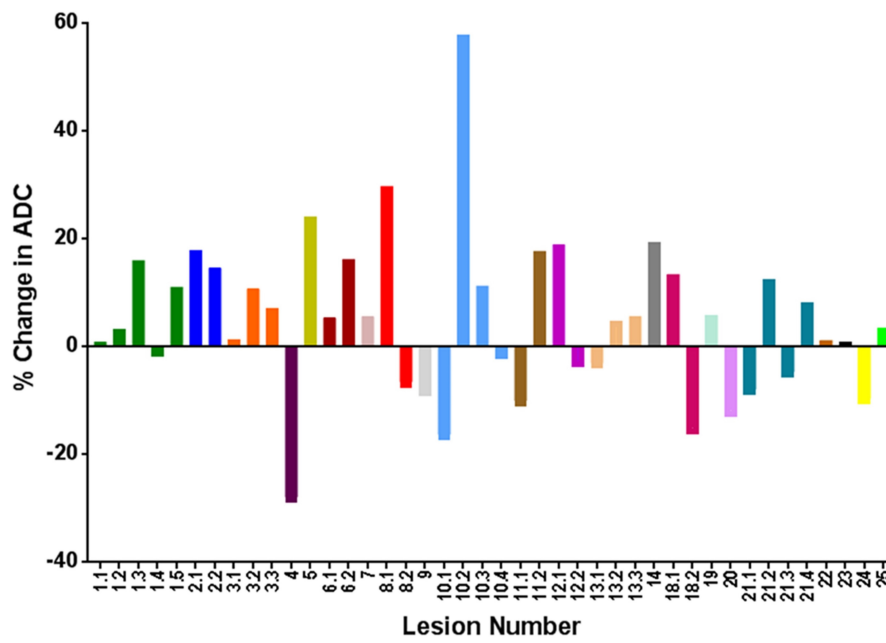

Supplement: jitc-2020-000655supp005.pdf [file jitc-2020-000655supp005.pdf]

Supplemental Fig. 3

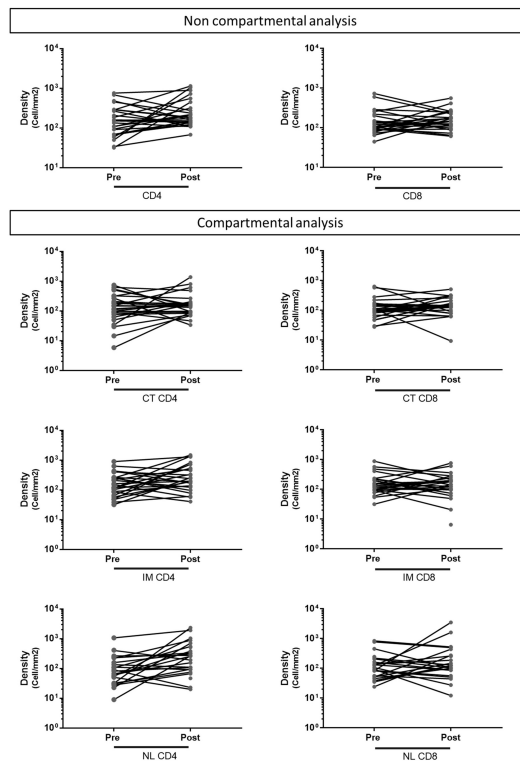

Supplement: jitc-2020-000655supp006.pdf [file jitc-2020-000655supp006.pdf]

Supplemental Fig. 4

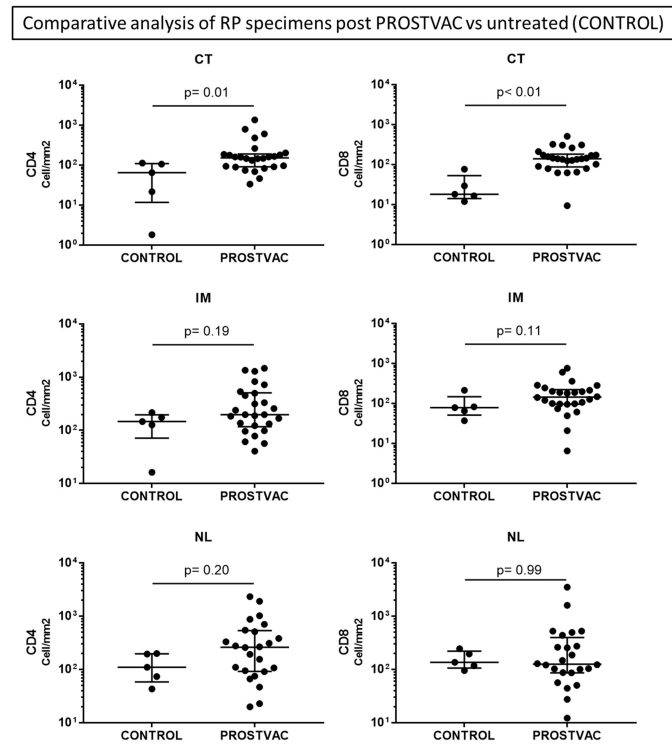

Supplement: jitc-2020-000655supp008.pdf [file jitc-2020-000655supp008.pdf]
